# Supplementary material for: Investigating Lignin-Derived Monomers and Oligomers in Low-Molecular-Weight Fractions Separated from Depolymerized Black Liquor Retentate by Membrane Filtration
Source: MDPI journal article supplement (doi:10.3390/molecules26102887), 2021-05-13
Supplement: s1 [file s1]

## **Supplementary Materials**

### **Title**

Investigating lignin-derived monomers and oligomers in low-molecular-weight fractions separated from depolymerized black liquor retentate by membrane filtration

### **Authors**

**Kena Li <sup>1,†</sup>, Jens Prothmann <sup>2,†</sup>, Margareta Sandahl <sup>2</sup>, Sara Blomberg <sup>1</sup>, Charlotta Turner <sup>2</sup> and Christian Hulteberg <sup>1,\*</sup>**

<sup>1</sup> Lund University, Department of Chemical Engineering, P.O. Box 124, SE-21100 Lund, Sweden; kena.li@chemeng.lth.se; sara.blomberg@chemeng.lth.se

<sup>2</sup> Lund University, Department of Chemistry, Centre for Analysis and Synthesis, P.O. Box 124, SE-22100 Lund, Sweden; Jens.prothmann@chem.lu.se; margareta.sandahl@chem.lu.se; charlotta.turner@chem.lu.se

\* Correspondence: christian.hulteberg@chemeng.lth.se; Tel: +46 46 222 8273

† The authors contributed equally to this work.

## Contents

**Table S1.** Identified phenolic compounds in the BDM170 sample including the detected [M-H]<sup>-</sup>, determined chemical formulas, classified class, obtained mass difference, obtained <sup>13</sup>C ratio, ring double bound (RDB) equivalent, retention times (RTs), obtained MS<sup>n</sup> spectra (\*: MS<sup>n</sup> of identified fragment) [1].

**Table S2.** Identified phenolic compounds in the BDM190 sample including the detected [M-H]<sup>-</sup>, determined chemical formulas, classified class, obtained mass difference, obtained <sup>13</sup>C ratio, ring double bound (RDB) equivalent, retention times (RTs), obtained MS<sup>n</sup> spectra (\*: MS<sup>n</sup> of identified fragment).

**Table S3.** Identified phenolic compounds in the BDM210 sample including the detected [M-H]<sup>-</sup>, determined chemical formulas, classified class, obtained mass difference, obtained <sup>13</sup>C ratio, ring double bound (RDB) equivalent, retention times (RTs), obtained MS<sup>n</sup> spectra (\*: MS<sup>n</sup> of identified fragment).

**Table S4.** Identified phenolic compounds in the 2BDM190 sample including the detected [M-H]<sup>-</sup>, determined chemical formulas, classified class, obtained mass difference, obtained <sup>13</sup>C ratio, ring double bound (RDB) equivalent, retention times (RTs), obtained MS<sup>n</sup> spectra (\*: MS<sup>n</sup> of identified fragment).

**Figure S1.** BPI of BDM170 (data already presented previously in Prothmann et al. 2020 [1]).

**Figure S2.** BPI of sample BDM210.

**Figure S3.** Van-Krevelen plot of sample BDM170.

**Figure S4.** Van-Krevelen plot of sample BDM190.

**Figure S5.** Van-Krevelen plot of sample BDM210.

**Figure S6.** Van-Krevelen plot of sample 2BDM190.

**Table S1.** Identified phenolic compounds in the BDM170 sample including the detected [M-H]<sup>-</sup>, determined chemical formulas, classified class, obtained mass difference, obtained <sup>13</sup>C ratio, ring double bound (RDB) equivalent, retention times (RTs), obtained MS<sup>n</sup> spectra (\*: MS<sup>n</sup> of identified fragment) [1].

| [M-H] <sup>-</sup> | Chemical formula (neutral)                       | Classified class | Mass diff. (mDa) | <sup>13</sup> C ratio | RDB | RTs (min) | MS <sup>n</sup> | Suggested compound                             | Identification confidence level |
|--------------------|--------------------------------------------------|------------------|------------------|-----------------------|-----|-----------|-----------------|------------------------------------------------|---------------------------------|
| 121.0295           | C <sub>7</sub> H <sub>6</sub> O <sub>2</sub>     | Monomer          | 0.0              | 1.10                  | 5.0 | 2.51      |                 | 4-hydroxybenzaldehyde                          | 1                               |
| 135.0451           | C <sub>8</sub> H <sub>8</sub> O <sub>2</sub>     | Monomer          | 0.0              | 1.04                  | 5.0 | 2.54      | MS <sup>2</sup> | 4-hydroxyacetophenone                          | 1                               |
| 137.0243           | C <sub>7</sub> H <sub>6</sub> O <sub>3</sub>     | Monomer          | -0.1             | 0.96                  | 5.0 | 4.05      | MS <sup>2</sup> | 4-hydroxybenzoic acid                          | 1                               |
| 151.0399           | C <sub>8</sub> H <sub>8</sub> O <sub>3</sub>     | Monomer          | -0.1             | 1.00                  | 5.0 | 1.25      | MS <sup>3</sup> | Vanillin                                       | 1                               |
| 165.0554           | C <sub>9</sub> H <sub>10</sub> O <sub>3</sub>    | Monomer          | -0.3             | 0.97                  | 5.0 | 1.25      |                 | Acetovanillone                                 | 1                               |
|                    |                                                  |                  |                  | 1.00                  |     | 2.23      | MS <sup>2</sup> | Homovanillin                                   | 2                               |
| 167.0347           | C <sub>8</sub> H <sub>8</sub> O <sub>4</sub>     | Monomer          | -0.3             | 1.03                  | 5.0 | 1.62      |                 | 3,4-dihydroxy-5-methoxybenzaldehyde            | 3                               |
|                    |                                                  |                  |                  | 1.04                  |     | 4.08      |                 | 2-(3,4-dihydroxyacetaldehyde                   | 3                               |
| 175.0761           | C <sub>11</sub> H <sub>12</sub> O <sub>2</sub>   | Monomer          | -0.3             | 0.97                  | 6.0 | 2.85      |                 | (5-ethylbenzo-furan-3-yl) methanol             | 3                               |
| 181.0502           | C <sub>9</sub> H <sub>10</sub> O <sub>4</sub>    | Monomer          | -0.4             | 1.06                  | 5.0 | 1.63      | MS <sup>3</sup> | Syringaldehyde                                 | 1                               |
|                    |                                                  |                  |                  | 0.95                  |     | 3.68      | MS <sup>3</sup> | 3,4-dihydroxy-5-methoxy-acetophenone           | 2                               |
| 195.0658           | C <sub>10</sub> H <sub>12</sub> O <sub>4</sub>   | Monomer          | -0.5             | 1.00                  | 5.0 | 1.63      |                 | Acetosyringone                                 | 1                               |
|                    |                                                  |                  |                  | 1.00                  |     | 3.22      |                 | 1-(3,4-dihydroxy-5-methoxyphenyl) propan-2-one | 3                               |
| 203.0709           | C <sub>12</sub> H <sub>12</sub> O <sub>3</sub>   | Monomer          | -0.4             | 1.00                  | 7.0 | 2.57      |                 | (7-methoxy-5-vinylbenzofuran-3-yl) methanol    | 3                               |
| 233.0270           | C <sub>12</sub> H <sub>10</sub> O <sub>3</sub> S | Dimer            | -0.8             | 1.03                  |     | 2.14      |                 |                                                | 3                               |
| 243.0653           | C <sub>14</sub> H <sub>12</sub> O <sub>4</sub>   | Dimer            | -1.0             | 1.08                  | 9.0 | 3.40      |                 |                                                | 3                               |
|                    |                                                  |                  |                  | 0.93                  |     | 3.52      |                 |                                                | 3                               |
| 245.0810           | C <sub>14</sub> H <sub>14</sub> O <sub>4</sub>   | Dimer            | -0.9             | 0.88                  | 8.0 | 5.26      |                 |                                                | 3                               |

|          |          |       |      |      |      |      |                 |  |   |
|----------|----------|-------|------|------|------|------|-----------------|--|---|
| 257.0447 | C14H10O5 | Dimer | -0.8 | 1.00 | 10.0 | 3.27 |                 |  | 3 |
| 257.0812 | C15H14O4 | Dimer | -0.7 | 0.95 | 9.0  | 2.85 |                 |  | 3 |
| 259.0604 | C14H12O5 | Dimer | -0.8 | 0.88 | 9.0  | 3.62 |                 |  | 3 |
| 271.0604 | C15H12O5 | Dimer | -0.8 | 1.00 | 10.0 | 3.13 |                 |  | 3 |
|          |          |       |      | 1.04 |      | 4.53 | MS <sup>3</sup> |  | 3 |
| 273.0759 | C15H14O5 | Dimer | -0.9 | 1.00 | 9.0  | 3.28 | MS <sup>3</sup> |  | 3 |
| 273.1124 | C16H18O4 | Dimer | -0.8 | °    | 8.0  | 3.99 |                 |  | 3 |
|          |          |       |      | 0.92 |      | 4.19 |                 |  | 3 |
| 287.0915 | C16H16O5 | Dimer | -1.0 | 0.92 | 9.0  | 2.94 | MS <sup>3</sup> |  | 2 |
|          |          |       |      | 0.94 |      | 3.13 |                 |  | 3 |
| 299.0916 | C17H16O5 | Dimer | -0.9 | 0.86 | 10.0 | 3.50 |                 |  | 3 |
| 301.0707 | C16H14O6 | Dimer | -1.0 | 0.96 | 10.0 | 1.26 |                 |  | 3 |
|          |          |       |      | 1.03 |      | 3.93 | MS <sup>3</sup> |  | 2 |
|          |          |       |      | 1.00 |      | 4.25 | MS <sup>3</sup> |  | 3 |
| 301.1071 | C17H18O5 | Dimer | -1.0 | 0.99 | 9.0  | 2.99 | MS <sup>3</sup> |  | 2 |
|          |          |       |      | 0.92 |      | 5.48 |                 |  | 3 |
| 301.1436 | C18H22O4 | Dimer | -0.9 | 1.00 | 8.0  | 4.87 |                 |  | 3 |
| 303.0865 | C16H16O6 | Dimer | -0.9 | 0.90 | 9.0  | 3.69 |                 |  | 3 |
| 313.1434 | C19H22O4 | Dimer | -1.1 | 0.98 | 9.0  | 5.18 | MS <sup>3</sup> |  | 3 |
|          |          |       |      | 1.00 |      | 5.75 | MS <sup>3</sup> |  | 3 |
| 315.0862 | C17H16O6 | Dimer | -1.2 | 1.07 | 10.0 | 1.26 |                 |  | 3 |
|          |          |       |      | 0.89 |      | 2.78 |                 |  | 3 |
|          |          |       |      | 1.08 |      | 4.00 | MS <sup>3</sup> |  | 3 |
|          |          |       |      | 0.85 |      | 5.12 |                 |  | 3 |
| 315.1227 | C18H20O5 | Dimer | -1.1 | 1.05 | 9.0  | 3.13 | MS <sup>3</sup> |  | 2 |
| 317.1021 | C17H18O6 | Dimer | -0.9 | 0.85 | 9.0  | 3.60 |                 |  | 3 |
| 323.0915 | C19H16O5 | Dimer | -1.0 | 0.91 | 12.0 | 3.86 |                 |  | 3 |

|          |          |       |      |      |      |      |                 |  |   |
|----------|----------|-------|------|------|------|------|-----------------|--|---|
| 329.1018 | C18H18O6 | Dimer | -1.2 | 1.00 | 10.0 | 1.26 |                 |  | 3 |
|          |          |       |      | 0.98 |      | 3.80 | MS <sup>2</sup> |  | 2 |
|          |          |       |      | 1.00 |      | 3.87 | MS <sup>2</sup> |  | 3 |
|          |          |       |      | 0.99 |      | 4.16 | MS <sup>2</sup> |  | 3 |
|          |          |       |      | 0.98 |      | 4.99 |                 |  | 3 |
| 329.1383 | C19H22O5 | Dimer | -1.1 | 0.99 | 9.0  | 2.99 |                 |  | 3 |
|          |          |       |      | 1.06 |      | 6.18 | MS <sup>3</sup> |  | 3 |
| 331.1176 | C18H20O6 | Dimer | -1.1 | 0.95 | 9.0  | 3.37 |                 |  | 3 |
|          |          |       |      | 1.00 |      | 4.69 | MS <sup>3</sup> |  | 2 |
| 343.1176 | C19H20O6 | Dimer | -1.1 | 1.05 | 10.0 | 3.72 |                 |  | 3 |
| 345.1332 | C19H22O6 | Dimer | -1.0 | 0.89 | 9.0  | 3.52 |                 |  | 3 |
|          |          |       |      | 1.05 |      | 6.86 | MS <sup>3</sup> |  | 3 |
| 347.1124 | C18H20O7 | Dimer | -1.2 | 0.95 | 9.0  | 4.09 |                 |  | 3 |
|          |          |       |      | 1.07 |      | 5.29 | MS <sup>3</sup> |  | 3 |
| 351.1228 | C21H20O5 | Dimer | -1.0 | 1.13 | 12.0 | 4.27 |                 |  | 3 |
| 355.1175 | C20H20O6 | Dimer | -1.2 | 0.91 | 11.0 | 4.12 |                 |  | 3 |
|          |          |       |      | 0.90 |      | 4.63 |                 |  | 3 |
| 359.1488 | C20H24O6 | Dimer | -1.2 | 1.00 | 9.0  | 4.47 | MS <sup>3</sup> |  | 2 |
|          |          |       |      | 0.96 |      | 4.66 |                 |  | 3 |
|          |          |       |      | 0.97 |      | 5.44 |                 |  | 3 |
| 365.1018 | C21H18O6 | Dimer | -1.2 | 0.92 | 13.0 | 4.84 |                 |  | 3 |
|          |          |       |      | 1.00 |      | 5.48 |                 |  | 3 |
| 373.1281 | C20H22O7 | Dimer | -1.2 | 1.09 | 10.0 | 3.66 |                 |  | 3 |
|          |          |       |      | 0.94 |      | 4.46 |                 |  | 3 |
|          |          |       |      | 0.93 |      | 5.29 |                 |  | 3 |
|          |          |       |      | 0.88 |      | 5.45 |                 |  | 3 |
|          |          |       |      | 1.00 |      | 5.50 |                 |  | 3 |

|          |          |       |      |      |      |      |  |  |   |
|----------|----------|-------|------|------|------|------|--|--|---|
| 379.1386 | C19H24O8 | Dimer | -1.2 | 0.94 | 8.0  | 5.22 |  |  | 3 |
| 399.1437 | C22H24O7 | Dimer | -1.2 | 0.92 | 11.0 | 4.05 |  |  | 3 |
| 419.1700 | C22H28O8 | Dimer | -1.1 | 0.88 | 9.0  | 4.77 |  |  | 3 |
|          |          |       |      | 0.89 |      | 4.83 |  |  | 3 |
|          |          |       |      | 0.96 |      | 5.34 |  |  | 3 |

**Table S2.** Identified phenolic compounds in the BDM190 sample including the detected [M-H]<sup>-</sup>, determined chemical formulas, classified class, obtained mass difference, obtained <sup>13</sup>C ratio, ring double bound (RDB) equivalent, retention times (RTs), obtained MS<sup>n</sup> spectra (\*: MS<sup>n</sup> of identified fragment).

| [M-H] <sup>-</sup> | Chemical formula (neutral) | Classified class | Mass diff. (mDa) | <sup>13</sup> C ratio | RDB | RTs (min) | MS <sup>n</sup> | Suggested compound    | Identification confidence level |
|--------------------|----------------------------|------------------|------------------|-----------------------|-----|-----------|-----------------|-----------------------|---------------------------------|
| 109.0296           | C6H6O2                     | Monomer          | 0.1              | 0.96                  | 4.0 | 0.56      |                 | Catechol              | 3                               |
| 121.0295           | C7H6O2                     | Monomer          | 0.0              | 1.00                  | 5.0 | 2.52      |                 | 4-hydroxybenzaldehyde | 1                               |
| 135.0450           | C8H8O2                     | Monomer          | 0.0              | 1.08                  | 5.0 | 2.55      |                 | 4-hydroxyacetophenone | 1                               |
| 137.0243           | C7H6O3                     | Monomer          | -0.1             | 0.86                  | 5.0 | 1.24      |                 |                       | 3                               |
|                    |                            |                  |                  | 1.00                  |     | 4.02      |                 |                       | 3                               |
| 151.0399           | C8H8O3                     | Monomer          | -0.1             | 1.00                  | 5.0 | 1.25      | MS <sup>3</sup> | Vanillin              | 1                               |
|                    |                            |                  |                  | 0.97                  |     | 3.62      |                 |                       | 3                               |
| 161.0605           | C10H10O2                   | Monomer          | -0.3             | 0.89                  | 6.0 | 2.83      | MS <sup>2</sup> |                       | 2                               |
|                    |                            |                  |                  | 0.91                  |     | 2.90      |                 |                       | 3                               |
|                    |                            |                  |                  | 0.94                  |     | 2.95      |                 |                       | 3                               |
|                    |                            |                  |                  | 1.08                  |     | 3.08      |                 |                       | 3                               |
| 165.0555           | C9H10O3                    | Monomer          | -0.2             | 1.03                  | 5.0 | 1.25      |                 | Acetovanillone        | 1                               |
|                    |                            |                  |                  | 1.09                  |     | 2.24      | MS <sup>3</sup> |                       | 2                               |
| 167.0346           | C8H8O4                     | Monomer          | -0.4             | 0.92                  | 5.0 | 1.24      |                 |                       | 3                               |
|                    |                            |                  |                  | 1.00                  |     | 1.63      |                 |                       | 3                               |
| 175.0761           | C11H12O2                   | Monomer          | -0.3             | 0.91                  | 6.0 | 2.69      |                 |                       | 3                               |
|                    |                            |                  |                  | 0.89                  |     | 2.80      |                 |                       | 3                               |
|                    |                            |                  |                  | 1.08                  |     | 2.86      |                 |                       | 3                               |
| 177.0554           | C10H10O3                   | Monomer          | -0.3             | 0.92                  | 6.0 | 3.55      |                 |                       | 3                               |
|                    |                            |                  |                  | 0.92                  |     | 3.65      |                 |                       | 3                               |
| 179.0709           | C10H12O3                   | Monomer          | -0.4             | 0.93                  | 5.0 | 1.20      |                 |                       | 3                               |
|                    | C10H12O3                   |                  |                  | 0.92                  |     | 2.19      |                 |                       | 3                               |

|          |          |         |      |      |      |      |                 |                |   |
|----------|----------|---------|------|------|------|------|-----------------|----------------|---|
|          | C10H12O3 |         |      | 0.91 |      | 2.81 |                 |                | 3 |
|          | C10H12O3 |         |      | 0.85 |      | 3.74 |                 |                | 3 |
| 181.0503 | C9H10O4  | Monomer | -0.3 | 1.00 | 5.0  | 1.63 | MS <sup>3</sup> | Syringaldehyde | 1 |
| 183.0295 | C8H8O5   | Monomer | -0.4 | 0.95 | 5.0  | 1.24 |                 |                | 3 |
| 191.0709 | C11H12O3 | Monomer | -0.4 | 0.89 | 6.0  | 1.61 |                 |                | 3 |
|          |          |         |      | 0.92 |      | 1.77 |                 |                | 3 |
|          |          |         |      | 0.96 |      | 3.62 |                 |                | 3 |
| 195.0658 | C10H12O4 | Monomer | -0.5 | 1.01 | 5.0  | 1.63 |                 | Acetosyringone | 1 |
|          |          |         |      | 1.02 |      | 2.93 |                 |                | 3 |
|          |          |         |      | 0.85 |      | 3.21 |                 |                | 3 |
| 213.0551 | C13H10O3 | Monomer | -0.6 | 0.97 | 9.0  | 3.63 |                 |                | 3 |
|          |          |         |      | 0.86 |      | 3.56 |                 |                | 3 |
| 241.0499 | C14H10O4 | Dimer   | -0.7 | 0.92 | 10.0 | 3.30 |                 |                | 3 |
|          |          |         |      | 1.00 |      | 4.70 |                 |                | 3 |
| 243.0654 | C14H12O4 | Dimer   | -0.9 | 1.09 | 9.0  | 3.40 |                 |                | 3 |
|          |          |         |      | 1.00 |      | 3.52 |                 |                | 3 |
| 245.0810 | C14H14O4 | Dimer   | -0.7 | 0.86 | 8.0  | 0.56 |                 |                | 3 |
|          |          |         |      | 0.97 |      | 2.53 |                 |                | 3 |
| 255.0656 | C15H12O4 | Dimer   | -0.7 | 0.85 | 10.0 | 3.05 |                 |                | 3 |
| 257.0812 | C15H14O4 | Dimer   | -0.7 | 0.95 | 9.0  | 2.87 |                 |                | 3 |
|          |          |         |      | 0.85 |      | 3.28 |                 |                | 3 |
|          |          |         |      | 0.87 |      | 3.34 |                 |                | 3 |
|          |          |         |      | 0.90 |      | 3.62 |                 |                | 3 |
|          |          |         |      | 0.85 |      | 3.80 |                 |                | 3 |
|          |          |         |      | 0.90 |      | 4.10 |                 |                | 3 |
| 259.0604 | C14H12O5 | Dimer   | -0.8 | 0.95 | 9.0  | 3.50 |                 |                | 3 |
|          |          |         |      | 1.04 |      | 3.62 |                 |                | 3 |



|          |          |       |      |      |      |      |                 |  |   |
|----------|----------|-------|------|------|------|------|-----------------|--|---|
| 259.0969 | C15H16O4 | Dimer | -0.7 | 0.86 | 8.0  | 0.59 |                 |  | 3 |
|          |          |       |      | 0.96 |      | 2.18 |                 |  | 3 |
|          |          |       |      | 0.86 |      | 4.67 |                 |  | 3 |
| 271.0604 | C15H12O5 | Dimer | -0.8 | 0.89 | 10.0 | 4.54 |                 |  | 3 |
| 271.0967 | C16H16O4 | Dimer | -0.9 | 0.88 | 9.0  | 3.74 |                 |  | 3 |
|          |          |       |      | 0.90 |      | 4.04 |                 |  | 3 |
| 273.0759 | C15H14O5 | Dimer | -0.9 | 1.00 | 9.0  | 3.28 | MS <sup>3</sup> |  | 3 |
|          |          |       |      | 0.97 |      | 3.58 | MS <sup>3</sup> |  | 3 |
|          |          |       |      | 1.00 |      | 4.25 |                 |  | 3 |
| 273.1123 | C16H18O4 | Dimer | -0.9 | 0.87 | 8.0  | 0.59 |                 |  | 3 |
|          |          |       |      | 0.89 |      | 2.06 |                 |  | 3 |
|          |          |       |      | 0.93 |      | 4.19 |                 |  | 3 |
| 275.0915 | C15H16O5 | Dimer | -1.0 | 0.89 | 8.0  | 3.78 |                 |  | 3 |
|          |          |       |      | 0.85 |      | 5.29 |                 |  | 3 |
| 285.0760 | C16H14O5 | Dimer | -0.8 | 0.96 | 10.0 | 4.22 |                 |  | 3 |
| 285.1124 | C17H18O4 | Dimer | -0.8 | 0.86 | 9.0  | 4.03 |                 |  | 3 |
| 287.0915 | C16H16O5 | Dimer | -1.0 | 0.88 | 9.0  | 2.95 |                 |  | 3 |
|          |          |       |      | 1.00 |      | 3.15 |                 |  | 3 |
| 287.1280 | C17H20O4 | Dimer | -0.9 | 0.90 | 8.0  | 4.15 |                 |  | 3 |
| 289.0708 | C15H14O6 | Dimer | -0.9 | 0.99 | 9.0  | 3.66 |                 |  | 3 |
| 299.0916 | C17H16O5 | Dimer | -0.9 | 1.00 | 10.0 | 4.06 |                 |  | 3 |
| 301.0707 | C16H14O6 | Dimer | -1.0 | 1.00 | 10.0 | 1.25 |                 |  | 3 |
|          |          |       |      | 1.00 |      | 3.94 | MS <sup>3</sup> |  | 2 |
|          |          |       |      | 0.96 |      | 4.04 |                 |  | 3 |
|          |          |       |      | 1.01 |      | 4.26 | MS <sup>3</sup> |  | 3 |
| 301.1071 | C17H18O5 | Dimer | -1.0 | 1.01 | 9.0  | 3.02 |                 |  | 3 |
|          |          |       |      | 0.97 |      | 3.08 |                 |  | 3 |

|          |          |       |      |      |      |      |                 |  |   |
|----------|----------|-------|------|------|------|------|-----------------|--|---|
| 301.1435 | C18H22O4 | Dimer | -1.0 | 0.93 | 8.0  | 4.87 |                 |  | 3 |
| 303.0864 | C16H16O6 | Dimer | -1.0 | 0.93 | 9.0  | 3.69 | MS <sup>3</sup> |  | 3 |
| 315.0863 | C17H16O6 | Dimer | -1.1 | 1.06 | 10.0 | 1.25 |                 |  | 3 |
|          |          |       |      | 1.00 |      | 2.78 |                 |  | 3 |
|          |          |       |      | 0.93 |      | 3.77 |                 |  | 3 |
|          |          |       |      | 1.00 |      | 4.00 | MS <sup>3</sup> |  | 3 |
| 315.1227 | C18H20O5 | Dimer | -1.1 | 0.94 | 9.0  | 2.86 |                 |  | 3 |
|          |          |       |      | 0.97 |      | 2.93 |                 |  | 3 |
|          |          |       |      | 1.00 |      | 3.14 |                 |  | 3 |
|          |          |       |      | 0.93 |      | 3.44 |                 |  | 3 |
| 317.1021 | C17H18O6 | Dimer | -0.9 | 1.00 | 9.0  | 3.59 |                 |  | 3 |
|          |          |       |      | 0.95 |      | 4.88 |                 |  | 3 |
| 325.1071 | C19H18O5 | Dimer | -1.0 | 0.93 | 11.0 | 4.03 |                 |  | 3 |
| 329.1018 | C18H18O6 | Dimer | -1.1 | 1.00 | 10.0 | 1.25 |                 |  | 3 |
|          |          |       |      | 1.01 |      | 3.80 | MS <sup>3</sup> |  | 2 |
|          |          |       |      | 0.96 |      | 3.87 | MS <sup>3</sup> |  | 3 |
| 329.1382 | C19H22O5 | Dimer | -1.1 | 0.94 | 9.0  | 2.99 |                 |  | 3 |
|          |          |       |      | 1.04 |      | 6.17 |                 |  | 3 |
| 331.1176 | C18H20O6 | Dimer | -1.1 | 0.96 | 9.0  | 3.39 |                 |  | 3 |
|          |          |       |      | 1.00 |      | 3.50 |                 |  | 3 |
|          |          |       |      | 0.87 |      | 4.43 |                 |  | 3 |
|          |          |       |      | 0.97 |      | 4.50 |                 |  | 3 |
|          |          |       |      | 0.92 |      | 4.59 |                 |  | 3 |
|          |          |       |      | 0.96 |      | 4.69 | MS <sup>3</sup> |  | 2 |
| 335.1125 | C17H20O7 | Dimer | -1.1 | 1.07 | 8.0  | 4.98 |                 |  | 3 |
|          |          |       |      | 1.05 |      | 5.03 |                 |  | 3 |
|          |          |       |      | 0.87 |      | 5.22 |                 |  | 3 |

|          |          |       |      |      |      |      |                 |  |   |
|----------|----------|-------|------|------|------|------|-----------------|--|---|
|          |          |       |      | 1.15 |      | 5.26 |                 |  | 3 |
| 339.1227 | C20H20O5 | Dimer | -1.1 | 0.90 | 11.0 | 3.78 |                 |  | 3 |
| 343.1175 | C19H20O6 | Dimer | -1.2 | 0.91 | 10.0 | 2.77 |                 |  | 3 |
|          |          |       |      | 1.00 |      | 3.72 |                 |  | 3 |
|          |          |       |      | 1.01 |      | 4.84 |                 |  | 3 |
|          |          |       |      | 1.00 |      | 4.89 |                 |  | 3 |
| 345.0968 | C18H18O7 | Dimer | -1.2 | 1.00 | 10.0 | 3.78 |                 |  | 3 |
| 345.1332 | C19H22O6 | Dimer | -1.1 | 1.00 | 9.0  | 3.52 |                 |  | 3 |
|          |          |       |      | 1.07 |      | 4.62 | MS <sup>3</sup> |  | 2 |
| 347.1124 | C18H20O7 | Dimer | -1.2 | 0.91 | 9.0  | 4.02 |                 |  | 3 |
|          |          |       |      | 1.07 |      | 4.10 | MS <sup>3</sup> |  | 2 |
|          |          |       |      | 1.05 |      | 5.30 |                 |  | 3 |
| 351.1225 | C21H20O5 | Dimer | -1.3 | 0.95 | 12.0 | 4.26 |                 |  | 3 |
| 355.1175 | C20H20O6 | Dimer | -1.2 | 0.91 | 11.0 | 4.10 |                 |  | 3 |
|          |          |       |      | 0.90 |      | 4.63 |                 |  | 3 |
| 359.1125 | C19H20O7 | Dimer | -1.1 | 0.87 | 10.0 | 6.89 |                 |  | 3 |
| 359.1488 | C20H24O6 | Dimer | -1.2 | 0.93 | 9.0  | 4.47 |                 |  | 3 |
| 365.1019 | C21H18O6 | Dimer | -1.1 | 1.00 | 13.0 | 4.84 |                 |  | 3 |
|          |          |       |      | 0.92 |      | 5.48 |                 |  | 3 |
| 373.1283 | C20H22O7 | Dimer | -1.0 | 1.00 | 10.0 | 5.49 |                 |  | 3 |
| 375.1437 | C20H24O7 | Dimer | -1.2 | 1.00 | 9.0  | 3.37 |                 |  | 3 |
|          |          |       |      | 0.95 |      | 3.63 |                 |  | 3 |
|          |          |       |      | 1.00 |      | 4.66 |                 |  | 3 |
|          |          |       |      | 1.00 |      | 4.69 |                 |  | 3 |
| 377.1230 | C19H22O8 | Dimer | -1.2 | 1.01 | 9.0  | 4.16 |                 |  | 3 |
| 383.1488 | C22H24O6 | Dimer | -1.2 | 0.89 | 11.0 | 4.66 |                 |  | 3 |
| 403.1386 | C21H24O8 | Dimer | -1.2 | 0.95 | 10.0 | 3.93 |                 |  | 3 |

|          |          |       |      |      |      |      |  |  |   |
|----------|----------|-------|------|------|------|------|--|--|---|
|          |          |       |      | 0.93 | 10.0 | 4.22 |  |  | 3 |
| 419.1702 | C22H28O8 | Dimer | -0.9 | 0.92 | 9.0  | 4.62 |  |  | 3 |
|          |          |       |      | 1.00 |      | 4.84 |  |  | 3 |
|          |          |       |      | 0.98 |      | 5.33 |  |  | 3 |
| 429.1543 | C23H26O8 | Dimer | -1.2 | 0.88 | 11.0 | 4.79 |  |  | 3 |

**Table S3.** Identified phenolic compounds in the BDM210 sample including the detected [M-H]<sup>-</sup>, determined chemical formulas, classified class, obtained mass difference, obtained <sup>13</sup>C ratio, ring double bound (RDB) equivalent, retention times (RTs), obtained MS<sup>n</sup> spectra (\*: MS<sup>n</sup> of identified fragment).

| [M-H] <sup>-</sup> | Chemical formula (neutral) | Classified class | Mass diff. (mDa) | <sup>13</sup> C ratio | RDB | RTs (min) | MS <sup>n</sup> | Suggested compound    | Identification confidence level |
|--------------------|----------------------------|------------------|------------------|-----------------------|-----|-----------|-----------------|-----------------------|---------------------------------|
| 121.0295           | C7H6O2                     | Monomer          | 0.0              | 1.15                  | 5.0 | 2.52      |                 | 4-hydroxybenzaldehyde | 1                               |
| 135.0451           | C8H8O2                     | Monomer          | 0.0              | 1.13                  | 5.0 | 2.12      |                 |                       | 3                               |
|                    |                            |                  |                  | 1.09                  |     | 2.44      |                 |                       | 3                               |
|                    |                            |                  |                  | 1.00                  |     | 2.55      |                 | 4-hydroxyacetophenone | 1                               |
| 137.0243           | C7H6O3                     | Monomer          | -0.1             | 0.88                  | 5.0 | 1.25      |                 |                       | 3                               |
|                    |                            |                  |                  | 0.86                  |     | 1.56      |                 |                       | 3                               |
|                    |                            |                  |                  | 0.88                  |     | 1.63      |                 |                       | 3                               |
|                    |                            |                  |                  | 0.98                  |     | 4.01      |                 | 4-hydroxybenzoic acid | 1                               |
| 145.0294           | C9H6O2                     | Monomer          | -0.1             | 0.87                  | 7.0 | 2.83      |                 |                       | 3                               |
| 147.0450           | C9H8O2                     | Monomer          | -0.1             | 1.00                  | 6.0 | 3.02      |                 |                       | 3                               |
| 149.0606           | C9H10O2                    | Monomer          | -0.2             | 0.93                  | 5.0 | 1.91      |                 |                       | 3                               |
|                    |                            |                  |                  | 0.91                  |     | 2.49      | MS <sup>2</sup> |                       | 2                               |
| 151.0398           | C8H8O3                     | Monomer          | -0.2             | 1.00                  | 5.0 | 1.26      | MS <sup>3</sup> | Vanillin              | 1                               |
| 161.0605           | C10H10O2                   | Monomer          | -0.3             | 1.00                  | 6.0 | 2.69      |                 |                       | 3                               |
|                    |                            |                  |                  | 1.03                  |     | 2.83      | MS <sup>2</sup> |                       | 2                               |
|                    |                            |                  |                  | 1.03                  |     | 2.90      |                 |                       | 3                               |
|                    |                            |                  |                  | 1.09                  |     | 2.94      |                 |                       | 3                               |
|                    |                            |                  |                  | 1.00                  |     | 3.06      |                 |                       | 3                               |
| 165.0554           | C9H10O3                    | Monomer          | -0.3             | 1.07                  | 5.0 | 1.25      |                 | Acetovanillone        | 1                               |
|                    |                            |                  |                  | 1.03                  |     | 2.24      | MS <sup>3</sup> |                       | 2                               |
| 175.0761           | C11H12O2                   | Monomer          | -0.3             | 1.07                  | 6.0 | 2.60      |                 |                       | 3                               |
|                    |                            |                  |                  | 0.94                  |     | 2.69      |                 |                       | 3                               |

|          |          |         |      |      |     |      |                 |                    |   |
|----------|----------|---------|------|------|-----|------|-----------------|--------------------|---|
|          |          |         |      | 1.00 |     | 2.81 |                 |                    | 3 |
|          |          |         |      | 1.05 |     | 2.85 | MS <sup>2</sup> |                    | 2 |
|          |          |         |      | 0.85 |     | 2.96 |                 |                    | 3 |
|          |          |         |      | 1.15 |     | 3.03 |                 |                    | 3 |
| 177.0554 | C10H10O3 | Monomer | -0.3 | 0.98 | 6.0 | 1.78 |                 | Coniferyl aldehyde | 1 |
|          |          |         |      | 0.96 |     | 2.74 |                 |                    | 3 |
|          |          |         |      | 0.97 |     | 3.55 |                 |                    | 3 |
|          |          |         |      | 1.10 |     | 3.66 | MS <sup>2</sup> |                    | 2 |
| 179.0347 | C9H8O4   | Monomer | -0.3 | 1.02 | 6.0 | 3.45 |                 |                    | 3 |
| 179.0710 | C10H12O3 | Monomer | -0.3 | 1.06 | 5.0 | 1.20 |                 |                    | 3 |
|          |          |         |      | 0.93 |     | 2.18 |                 |                    | 3 |
|          |          |         |      | 0.90 |     | 2.81 |                 |                    | 3 |
|          |          |         |      | 0.88 |     | 3.03 |                 | Coniferyl alcohol  | 1 |
|          |          |         |      | 0.88 |     | 3.45 |                 |                    | 3 |
|          |          |         |      | 0.86 |     | 4.01 |                 |                    | 3 |
| 181.0501 | C9H10O4  | Monomer | -0.5 | 0.91 | 5.0 | 1.25 |                 |                    | 3 |
|          |          |         |      | 1.00 |     | 1.63 | MS <sup>3</sup> | Syringaldehyde     | 1 |
| 183.0294 | C8H8O5   | Monomer | -0.5 | 1.02 | 5.0 | 1.25 |                 |                    | 3 |
| 185.0603 | C12H10O2 | Monomer | -0.5 | 1.15 | 8.0 | 1.56 |                 |                    | 3 |
|          |          |         |      | 1.08 |     | 2.69 | MS <sup>2</sup> |                    | 2 |
|          |          |         |      | 1.07 |     | 3.86 |                 |                    | 3 |
| 187.0396 | C11H8O3  | Monomer | -0.4 | 1.00 | 8.0 | 3.41 |                 |                    | 3 |
| 187.0760 | C12H12O2 | Monomer | -0.4 | 0.94 | 7.0 | 3.19 |                 |                    | 3 |
|          |          |         |      | 0.92 |     | 3.23 |                 |                    | 3 |
| 191.0709 | C11H12O3 | Monomer | -0.4 | 0.93 | 6.0 | 3.38 |                 |                    | 3 |
|          |          |         |      | 1.05 |     | 3.51 |                 |                    | 3 |
|          |          |         |      | 1.02 |     | 3.61 | MS <sup>3</sup> |                    | 2 |

|          |          |         |      |      |      |      |                 |                |   |
|----------|----------|---------|------|------|------|------|-----------------|----------------|---|
| 195.0446 | C13H8O2  | Monomer | -0.5 | 0.91 | 10.0 | 4.30 |                 |                | 3 |
| 195.0657 | C10H12O4 | Monomer | -0.6 | 0.99 | 5.0  | 1.63 |                 | Acetosyringone | 1 |
|          |          |         |      | 0.93 |      | 2.87 |                 |                | 3 |
|          |          |         |      | 0.94 |      | 2.93 |                 |                | 3 |
|          |          |         |      | 1.00 |      | 3.00 |                 |                | 3 |
|          |          |         |      | 1.00 |      | 3.21 |                 |                | 3 |
| 201.0552 | C12H10O3 | Monomer | -0.5 | 0.85 | 8.0  | 3.18 |                 |                | 3 |
| 203.0709 | C12H12O3 | Monomer | -0.4 | 0.96 | 7.0  | 2.58 |                 |                | 3 |
|          |          |         |      | 1.00 |      | 3.41 |                 |                | 3 |
| 213.0551 | C13H10O3 | Monomer | -0.6 | 1.05 | 9.0  | 3.63 | MS <sup>2</sup> |                | 2 |
| 227.0343 | C13H8O4  | Monomer | -0.7 | 1.11 | 10.0 | 4.28 |                 |                | 3 |
| 227.0706 | C14H12O3 | Dimer   | -0.7 | 0.93 | 9.0  | 3.45 |                 |                | 3 |
|          |          |         |      | 1.00 |      | 3.55 |                 |                | 3 |
| 229.0499 | C13H10O4 | Monomer | -0.7 | 1.00 | 9.0  | 5.46 |                 |                | 3 |
| 231.0655 | C13H12O4 | Monomer | -0.8 | 0.89 | 8.0  | 0.58 |                 |                | 3 |
|          |          |         |      | 0.90 |      | 2.72 |                 |                | 3 |
| 241.0498 | C14H10O4 | Dimer   | -0.8 | 0.93 | 10.0 | 3.28 |                 |                | 3 |
|          |          |         | -0.8 | 1.07 | 10.0 | 4.25 |                 |                | 3 |
|          |          |         | -0.8 | 0.89 | 10.0 | 4.72 |                 |                | 3 |
| 241.0865 | C15H14O3 | Dimer   | -0.5 | 1.14 | 9.0  | 3.41 |                 |                | 3 |
| 243.0654 | C14H12O4 | Dimer   | -0.8 | 0.98 | 9.0  | 3.41 |                 |                | 3 |
|          |          |         |      | 1.11 |      | 3.51 |                 |                | 3 |
|          |          |         |      | 1.00 |      | 3.92 |                 |                | 3 |
|          |          |         |      | 0.87 |      | 5.29 |                 |                | 3 |
| 243.1018 | C15H16O3 | Dimer   | -0.8 | 0.90 | 8.0  | 4.14 |                 |                | 3 |
|          |          |         |      | 0.86 |      | 4.34 |                 |                | 3 |
| 245.0810 | C14H14O4 | Dimer   | -0.9 | 0.95 | 8.0  | 0.56 |                 |                | 3 |

|          |          |       |      |      |      |      |                 |  |   |
|----------|----------|-------|------|------|------|------|-----------------|--|---|
|          |          |       |      | 0.90 |      | 2.07 |                 |  | 3 |
|          |          |       |      | 1.07 |      | 2.53 |                 |  | 3 |
|          |          |       |      | 0.92 |      | 3.03 |                 |  | 3 |
|          |          |       |      | 1.00 |      | 5.26 |                 |  | 3 |
|          |          |       |      | 0.88 |      | 6.20 |                 |  | 3 |
| 255.0654 | C15H12O4 | Dimer | -0.9 | 0.89 | 10.0 | 3.05 |                 |  | 3 |
|          |          |       |      | 0.90 |      | 3.15 |                 |  | 3 |
|          |          |       |      | 0.86 |      | 4.14 |                 |  | 3 |
|          |          |       |      | 0.97 |      | 4.46 |                 |  | 3 |
| 257.0448 | C14H10O5 | Dimer | -0.7 | 0.87 | 10.0 | 3.41 |                 |  | 3 |
|          |          |       |      | 1.15 |      | 4.27 |                 |  | 3 |
| 257.0810 | C15H14O4 | Dimer | -0.9 | 0.97 | 9.0  | 2.87 |                 |  | 3 |
|          |          |       |      | 0.96 |      | 3.29 |                 |  | 3 |
|          |          |       |      | 0.92 |      | 3.34 |                 |  | 3 |
|          |          |       |      | 1.05 |      | 3.64 |                 |  | 3 |
|          |          |       |      | 0.96 |      | 3.79 |                 |  | 3 |
|          |          |       |      | 0.85 |      | 3.83 |                 |  | 3 |
| 259.0603 | C14H12O5 | Dimer | -0.9 | 0.97 | 9.0  | 3.51 |                 |  | 3 |
|          |          |       |      | 1.07 |      | 3.57 | MS <sup>3</sup> |  | 2 |
| 259.0966 | C15H16O4 | Dimer | -1.0 | 0.91 | 8.0  | 0.58 |                 |  | 3 |
| 269.0812 | C16H14O4 | Dimer | -0.7 | 0.93 | 10.0 | 4.06 |                 |  | 3 |
|          |          |       |      | 0.98 |      | 4.60 |                 |  | 3 |
| 271.0604 | C15H12O5 | Dimer | -0.8 | 1.00 | 10.0 | 4.37 |                 |  | 3 |
|          |          |       |      | 1.02 |      | 4.54 |                 |  | 3 |
|          |          |       |      | 0.98 |      | 5.44 |                 |  | 3 |
| 271.0966 | C16H16O4 | Dimer | -1.0 | 1.00 | 9.0  | 2.87 |                 |  | 3 |
|          |          |       |      | 0.86 |      | 3.64 |                 |  | 3 |



|          |          |       |      |      |      |      |                 |  |   |
|----------|----------|-------|------|------|------|------|-----------------|--|---|
|          |          |       |      | 0.92 |      | 3.73 |                 |  | 3 |
|          |          |       |      | 0.95 |      | 4.04 |                 |  | 3 |
|          |          |       |      | 1.07 |      | 4.33 |                 |  | 3 |
| 273.0758 | C15H14O5 | Dimer | -1.0 | 0.89 | 9.0  | 2.49 |                 |  | 3 |
|          |          |       |      | 0.92 |      | 3.00 |                 |  | 3 |
|          |          |       |      | 1.02 |      | 3.29 | MS <sup>3</sup> |  | 3 |
|          |          |       |      | 1.00 |      | 3.47 |                 |  | 3 |
|          |          |       |      | 1.00 |      | 3.53 |                 |  | 3 |
|          |          |       |      | 1.10 |      | 3.57 | MS <sup>3</sup> |  | 2 |
|          |          |       |      | 0.90 |      | 4.01 |                 |  | 3 |
|          |          |       |      | 1.02 |      | 4.25 |                 |  | 3 |
| 273.1124 | C16H18O4 | Dimer | -0.8 | 0.88 | 8.0  | 0.59 |                 |  | 3 |
|          |          |       |      | 1.03 |      | 2.40 |                 |  | 3 |
| 275.0915 | C15H16O5 | Dimer | -1.0 | 0.93 | 8.0  | 2.84 |                 |  | 3 |
|          |          |       |      | 0.88 |      | 3.77 |                 |  | 3 |
| 281.0811 | C17H14O4 | Dimer | -0.8 | 0.91 | 11.0 | 4.51 |                 |  | 3 |
| 283.0967 | C17H16O4 | Dimer | -0.9 | 0.93 | 10.0 | 4.05 |                 |  | 3 |
|          |          |       |      | 0.87 |      | 4.17 |                 |  | 3 |
| 285.0760 | C16H14O5 | Dimer | -0.8 | 0.93 | 10.0 | 4.22 |                 |  | 3 |
| 287.0553 | C15H12O6 | Dimer | -0.8 | 1.00 | 10.0 | 4.17 |                 |  | 3 |
| 287.0914 | C16H16O5 | Dimer | -1.1 | 0.97 | 9.0  | 2.96 |                 |  | 3 |
|          |          |       |      | 1.00 |      | 3.15 | MS <sup>3</sup> |  | 3 |
| 287.1280 | C17H20O4 | Dimer | -0.9 | 0.94 | 8.0  | 0.59 |                 |  | 3 |
|          |          |       |      | 0.86 |      | 2.37 |                 |  | 3 |
| 289.0708 | C15H14O6 | Dimer | -0.9 | 0.98 | 9.0  | 3.66 |                 |  | 3 |
|          |          |       |      | 0.94 |      | 3.73 |                 |  | 3 |
|          |          |       |      | 1.11 |      | 3.77 |                 |  | 3 |

|          |          |       |      |      |      |      |                 |  |   |
|----------|----------|-------|------|------|------|------|-----------------|--|---|
| 289.1071 | C16H18O5 | Dimer | -1.0 | 0.95 | 8.0  | 4.21 | MS <sup>3</sup> |  | 3 |
| 299.0915 | C17H16O5 | Dimer | -0.9 | 1.00 | 10.0 | 4.06 |                 |  | 3 |
| 301.0707 | C16H14O6 | Dimer | -1.0 | 1.06 | 10.0 | 1.28 |                 |  | 3 |
|          |          |       |      | 0.92 |      | 3.93 | MS <sup>3</sup> |  | 2 |
|          |          |       |      | 1.02 |      | 4.06 |                 |  | 3 |
|          |          |       |      | 1.06 |      | 4.25 | MS <sup>3</sup> |  | 3 |
| 301.1070 | C17H18O5 | Dimer | -1.1 | 0.95 | 9.0  | 3.07 |                 |  | 3 |
| 301.1436 | C18H22O4 | Dimer | -0.9 | 1.00 | 8.0  | 4.76 |                 |  | 3 |
|          |          |       |      | 0.90 |      | 4.86 |                 |  | 3 |
| 303.0863 | C16H16O6 | Dimer | -1.1 | 0.86 | 9.0  | 3.69 | MS <sup>3</sup> |  | 3 |
| 303.1227 | C17H20O5 | Dimer | -1.1 | 1.00 | 8.0  | 4.30 |                 |  | 3 |
| 311.0915 | C18H16O5 | Dimer | -1.0 | 0.94 | 11.0 | 4.21 |                 |  | 3 |
| 313.1434 | C19H22O4 | Dimer | -1.1 | 1.00 | 9.0  | 5.17 |                 |  | 3 |
|          |          |       |      | 1.00 |      | 5.74 | MS <sup>3</sup> |  | 3 |
| 315.1225 | C18H20O5 | Dimer | -1.2 | 0.92 | 9.0  | 2.85 |                 |  | 3 |
|          |          |       |      | 0.99 |      | 2.93 |                 |  | 3 |
|          |          |       |      | 1.04 |      | 3.13 |                 |  | 3 |
|          |          |       |      | 1.03 |      | 3.45 |                 |  | 3 |
| 317.1019 | C17H18O6 | Dimer | -1.1 | 0.92 | 9.0  | 4.49 |                 |  | 3 |
|          |          |       |      | 1.01 |      | 4.56 |                 |  | 3 |
|          |          |       |      | 0.93 |      | 4.63 |                 |  | 3 |
|          |          |       |      | 0.94 |      | 4.88 | MS <sup>3</sup> |  | 2 |
| 317.1383 | C18H22O5 | Dimer | -1.1 | 1.00 | 8.0  | 3.54 |                 |  | 3 |
| 319.1177 | C17H20O6 | Dimer | -1.0 | 0.85 | 8.0  | 5.00 |                 |  | 3 |
| 329.1382 | C19H22O5 | Dimer | -1.2 | 1.00 | 9.0  | 2.99 |                 |  | 3 |
| 331.1176 | C18H20O6 | Dimer | -1.1 | 1.00 | 9.0  | 3.50 |                 |  | 3 |
|          |          |       |      | 0.95 |      | 4.34 |                 |  | 3 |

|          |          |       |      |      |      |      |                 |  |   |
|----------|----------|-------|------|------|------|------|-----------------|--|---|
|          |          |       |      | 0.89 |      | 4.41 |                 |  | 3 |
|          |          |       |      | 0.93 |      | 4.59 |                 |  | 3 |
|          |          |       |      | 0.91 |      | 4.69 | MS <sup>3</sup> |  | 3 |
| 337.1071 | C20H18O5 | Dimer | -1.0 | 1.00 | 12.0 | 5.00 |                 |  | 3 |
| 339.1227 | C20H20O5 | Dimer | -1.1 | 0.92 | 11.0 | 3.79 |                 |  | 3 |
| 345.1331 | C19H22O6 | Dimer | -1.2 | 0.89 | 9.0  | 4.28 |                 |  | 3 |
|          |          |       |      | 0.95 |      | 4.46 |                 |  | 3 |
|          |          |       |      | 0.97 |      | 4.56 |                 |  | 3 |
|          |          |       |      | 0.96 |      | 4.60 | MS <sup>3</sup> |  | 2 |
|          |          |       |      | 1.00 |      | 6.86 |                 |  | 3 |
| 355.1175 | C20H20O6 | Dimer | -1.2 | 0.93 | 11.0 | 4.63 |                 |  | 3 |
| 357.1332 | C20H22O6 | Dimer | -1.1 | 0.91 | 10.0 | 1.20 |                 |  | 3 |
|          |          |       |      | 0.97 |      | 3.58 |                 |  | 3 |
|          |          |       |      | 0.97 |      | 4.60 |                 |  | 3 |
|          |          |       |      | 0.86 |      | 6.20 |                 |  | 3 |
| 359.1491 | C20H24O6 | Dimer | -0.9 | 0.89 | 9.0  | 4.19 |                 |  | 3 |
|          |          |       |      | 0.91 |      | 5.45 |                 |  | 3 |
| 365.1019 | C21H18O6 | Dimer | -1.1 | 0.97 | 13.0 | 5.48 |                 |  | 3 |
| 373.1281 | C20H22O7 | Dimer | -1.2 | 0.92 | 10.0 | 5.45 |                 |  | 3 |
|          |          |       |      | 0.91 |      | 5.49 |                 |  | 3 |
| 375.1437 | C20H24O7 | Dimer | -1.2 | 0.93 | 9.0  | 3.37 |                 |  | 3 |
|          |          |       |      | 1.08 |      | 4.66 |                 |  | 3 |
|          |          |       |      | 0.94 |      | 5.48 |                 |  | 3 |
|          |          |       |      | 1.00 |      | 5.57 |                 |  | 3 |
| 387.1437 | C21H24O7 | Dimer | 1.1  | 1.03 | 14.0 | 5.14 |                 |  | 3 |
| 397.1281 | C22H22O7 | Dimer | -1.2 | 0.89 | 12.0 | 5.24 |                 |  | 3 |
| 405.1543 | C21H26O8 | Dimer | -1.2 | 0.86 | 9.0  | 4.78 |                 |  | 3 |

|          |          |        |      |      |      |      |  |  |   |
|----------|----------|--------|------|------|------|------|--|--|---|
|          |          |        |      | 0.89 |      | 5.07 |  |  | 3 |
| 511.1963 | C28H32O9 | Trimer | -1.0 | 0.96 | 13.0 | 6.11 |  |  |   |

**Table S4.** Identified phenolic compounds in the 2BDM190 sample including the detected [M-H]<sup>-</sup>, determined chemical formulas, classified class, obtained mass difference, obtained <sup>13</sup>C ratio, ring double bound (RDB) equivalent, retention times (RTs), obtained MS<sup>n</sup> spectra (\*: MS<sup>n</sup> of identified fragment).

| [M-H] <sup>-</sup> | Chemical formula (neutral) | Classified class | Mass diff. (mDa) | <sup>13</sup> C ratio | RDB  | RTs (min) | MS <sup>n</sup> | Suggested compound                             | Identification confidence level |
|--------------------|----------------------------|------------------|------------------|-----------------------|------|-----------|-----------------|------------------------------------------------|---------------------------------|
| 121.0296           | C7H6O2                     | Monomer          | 0.1              | 1.03                  | 5.0  | 2.50      |                 | 4-hydroxybenzaldehyde                          | 1                               |
| 137.0245           | C7H6O3                     | Monomer          | 0.1              | 0.96                  | 5.0  | 4.02      |                 | 4-hydroxybenzoic acid                          | 1                               |
| 151.0400           | C8H8O3                     | Monomer          | 0.0              | 1.00                  | 5.0  | 1.26      | MS <sup>3</sup> | Vanillin                                       | 1                               |
| 177.0556           | C10H10O3                   | Monomer          | -0.1             | 1.07                  | 6.0  | 3.55      |                 | (E)-3,4-dihydroxy-benzylideneacetone           | 3                               |
|                    |                            |                  |                  | 0.89                  |      | 3.66      |                 |                                                | 3                               |
| 191.0712           | C11H12O3                   | Monomer          | -0.1             | 0.86                  | 6.0  | 3.44      |                 |                                                | 3                               |
|                    |                            |                  |                  | 0.96                  |      | 3.61      |                 |                                                | 3                               |
| 195.0660           | C10H12O4                   | Monomer          | -0.3             | 0.88                  | 5.0  | 1.64      |                 | Acetosyringone                                 | 1                               |
|                    |                            |                  |                  | 0.88                  |      | 3.23      |                 | 1-(3,4-dihydroxy-5-methoxyphenyl) propan-2-one | 3                               |
| 227.0710           | C14H12O3                   | Dimer            | -0.3             | 1.06                  | 9.0  | 3.55      |                 |                                                | 3                               |
| 243.0657           | C14H12O4                   | Dimer            | -0.6             | 0.93                  | 9.0  | 3.41      |                 |                                                | 3                               |
|                    |                            |                  |                  | 1.07                  |      | 3.90      |                 |                                                | 3                               |
| 245.0813           | C14H14O4                   | Dimer            | -0.6             | 1.07                  | 8.0  | 2.54      |                 |                                                | 3                               |
|                    |                            |                  |                  | 0.95                  |      | 4.04      |                 |                                                | 3                               |
| 255.0657           | C15H12O4                   | Dimer            | -0.6             | 0.88                  | 10.0 | 4.43      |                 |                                                | 3                               |
| 257.0813           | C15H14O4                   | Dimer            | -0.6             | 1.00                  | 9.0  | 2.86      |                 |                                                | 3                               |
|                    |                            |                  |                  | 0.89                  |      | 3.27      |                 |                                                | 3                               |
|                    |                            |                  |                  | 0.86                  |      | 3.34      |                 |                                                | 3                               |
|                    |                            |                  |                  | 1.05                  |      | 3.61      |                 |                                                | 3                               |
|                    |                            |                  |                  | 0.93                  |      | 3.82      |                 |                                                | 3                               |

|          |          |       |      |      |      |      |                 |  |   |
|----------|----------|-------|------|------|------|------|-----------------|--|---|
| 259.0608 | C14H12O5 | Dimer | -0.4 | 1.03 | 9.0  | 3.61 | MS <sup>3</sup> |  | 2 |
| 271.0970 | C16H16O4 | Dimer | -0.6 | 0.97 | 9.0  | 2.88 |                 |  | 3 |
|          |          |       |      | 1.06 |      | 3.63 |                 |  | 3 |
|          |          |       |      | 0.85 |      | 3.92 |                 |  | 3 |
|          |          |       |      | 0.85 |      | 4.04 |                 |  | 3 |
| 273.0762 | C15H14O5 | Dimer | -0.6 | 0.93 | 9.0  | 2.52 |                 |  | 3 |
|          |          |       |      | 1.07 |      | 3.27 | MS <sup>3</sup> |  | 3 |
|          |          |       |      | 1.02 |      | 3.58 | MS <sup>3</sup> |  | 3 |
|          |          |       |      | 1.03 |      | 4.25 |                 |  | 3 |
| 273.1127 | C16H18O4 | Dimer | -0.5 | 0.85 | 8.0  | 2.41 |                 |  | 3 |
| 287.0918 | C16H16O5 | Dimer | -0.7 | 1.00 | 9.0  | 3.14 |                 |  | 3 |
| 289.1078 | C16H18O5 | Dimer | -0.3 | 0.86 | 8.0  | 4.13 |                 |  | 3 |
|          |          |       |      | 0.97 |      | 4.21 |                 |  | 3 |
| 297.0763 | C17H14O5 | Dimer | -0.5 | 1.00 | 11.0 | 4.24 | MS <sup>3</sup> |  | 3 |
| 297.1491 | C19H22O3 | Dimer | -0.5 | 1.00 | 9.0  | 4.66 |                 |  | 3 |
| 299.0920 | C17H16O5 | Dimer | -0.5 | 0.92 | 10.0 | 3.73 |                 |  | 3 |
| 301.0711 | C16H14O6 | Dimer | -0.6 | 1.00 | 10.0 | 3.93 | MS <sup>3</sup> |  | 2 |
| 301.1075 | C17H18O5 | Dimer | -0.6 | 0.93 | 9.0  | 2.86 |                 |  | 3 |
|          |          |       |      | 1.06 |      | 3.08 |                 |  | 3 |
|          |          |       |      | 0.87 |      | 3.29 |                 |  | 3 |
| 303.0868 | C16H16O6 | Dimer | -0.6 | 0.87 | 9.0  | 2.71 | MS <sup>3</sup> |  | 3 |
| 311.0919 | C18H16O5 | Dimer | -0.6 | 0.95 | 11.0 | 4.21 |                 |  | 3 |
| 313.1438 | C19H22O4 | Dimer | -0.7 | 1.00 | 9.0  | 5.18 |                 |  | 3 |
|          |          |       |      | 1.10 |      | 5.75 | MS <sup>3</sup> |  | 3 |
| 315.0867 | C17H16O6 | Dimer | -0.7 | 0.85 | 10.0 | 1.26 |                 |  | 3 |
|          |          |       |      | 0.87 |      | 3.57 |                 |  | 3 |
|          |          |       |      | 0.88 |      | 3.76 |                 |  | 3 |

|          |          |       |      |      |      |      |                 |  |   |
|----------|----------|-------|------|------|------|------|-----------------|--|---|
|          |          |       |      | 0.88 |      | 3.99 |                 |  | 3 |
| 315.1231 | C18H20O5 | Dimer | -0.7 | 1.06 | 9.0  | 2.94 | MS <sup>3</sup> |  | 2 |
|          |          |       |      | 1.08 |      | 3.12 | MS <sup>3</sup> |  | 2 |
|          |          |       |      | 1.00 |      | 3.44 |                 |  | 3 |
| 323.0919 | C19H16O5 | Dimer | -0.6 | 0.91 | 12.0 | 3.86 |                 |  | 3 |
|          |          |       |      | 0.90 |      | 4.75 |                 |  | 3 |
| 329.1024 | C18H18O6 | Dimer | -0.6 | 1.02 | 10.0 | 3.79 | MS <sup>3</sup> |  | 2 |
|          |          |       |      | 1.00 |      | 4.45 |                 |  | 3 |
| 329.1387 | C19H22O5 | Dimer | -0.7 | 0.92 | 9.0  | 6.18 |                 |  | 3 |
| 331.0815 | C17H16O7 | Dimer | -0.8 | 0.93 | 10.0 | 3.92 |                 |  | 3 |
| 331.1180 | C18H20O6 | Dimer | -0.7 | 1.00 | 9.0  | 4.28 |                 |  | 3 |
| 333.0972 | C17H18O7 | Dimer | -0.8 | 0.91 | 9.0  | 3.78 |                 |  | 3 |
| 339.1231 | C20H20O5 | Dimer | -0.7 | 0.89 | 11.0 | 3.78 |                 |  | 3 |
| 343.1181 | C19H20O6 | Dimer | -0.6 | 0.96 | 10.0 | 2.77 |                 |  | 3 |
|          |          |       |      | 1.07 |      | 3.60 |                 |  | 3 |
|          |          |       |      | 1.00 |      | 3.72 |                 |  | 3 |
|          |          |       |      | 0.85 |      | 4.89 |                 |  | 3 |
| 343.1543 | C20H24O5 | Dimer | -0.8 | 1.00 | 9.0  | 3.01 |                 |  | 3 |
|          |          |       |      | 0.94 |      | 3.11 |                 |  | 3 |
| 345.0971 | C18H18O7 | Dimer | -0.9 | 0.93 | 10.0 | 3.78 |                 |  | 3 |
| 345.1337 | C19H22O6 | Dimer | -0.6 | 1.02 | 9.0  | 4.62 | MS <sup>3</sup> |  | 2 |
|          |          |       |      | 0.94 |      | 6.87 |                 |  | 3 |
| 349.1073 | C21H18O5 | Dimer | -0.8 | 1.00 | 13.0 | 3.95 |                 |  | 3 |
| 357.1336 | C20H22O6 | Dimer | -0.7 | 0.91 | 10.0 | 2.66 |                 |  | 3 |
|          |          |       |      | 0.90 |      | 3.57 |                 |  | 3 |
|          |          |       |      | 0.96 |      | 4.22 |                 |  | 3 |
| 361.0920 | C18H18O8 | Dimer | -0.9 | 0.96 | 10.0 | 3.90 |                 |  | 3 |

|          |          |        |      |      |      |      |                 |  |   |
|----------|----------|--------|------|------|------|------|-----------------|--|---|
| 361.1647 | C20H26O6 | Dimer  | -0.9 | 1.06 | 8.0  | 5.06 | MS <sup>3</sup> |  | 2 |
|          |          |        |      | 1.00 |      | 5.31 |                 |  | 3 |
| 365.1024 | C21H18O6 | Dimer  | -0.6 | 0.92 | 13.0 | 5.48 |                 |  | 3 |
| 373.1285 | C20H22O7 | Dimer  | -0.8 | 0.99 | 10.0 | 5.45 |                 |  | 3 |
|          |          |        |      | 0.92 |      | 5.51 |                 |  | 3 |
| 375.1442 | C20H24O7 | Dimer  | -0.7 | 0.95 | 9.0  | 4.66 |                 |  | 3 |
| 379.1179 | C22H20O6 | Dimer  | -0.8 | 0.99 | 13.0 | 4.13 |                 |  | 3 |
| 387.1439 | C21H24O7 | Dimer  | -1.0 | 1.02 | 10.0 | 4.36 |                 |  | 3 |
| 389.1595 | C21H26O7 | Dimer  | -1.1 | 1.00 | 9.0  | 4.71 |                 |  | 3 |
|          |          |        |      | 0.92 |      | 5.16 |                 |  | 3 |
| 403.1390 | C21H24O8 | Dimer  | -0.8 | 1.04 | 10.0 | 3.93 |                 |  | 3 |
| 403.1757 | C22H28O7 | Dimer  | -0.5 | 1.03 | 9.0  | 4.54 |                 |  | 3 |
| 405.1546 | C21H26O8 | Dimer  | -0.9 | 0.87 | 9.0  | 4.75 |                 |  | 3 |
|          |          |        |      | 0.85 |      | 5.07 |                 |  | 3 |
| 409.1283 | C23H22O7 | Dimer  | -1.0 | 1.00 | 13.0 | 4.19 |                 |  | 3 |
|          |          |        |      | 0.94 |      | 4.84 |                 |  | 3 |
| 423.1076 | C23H20O8 | Dimer  | -0.9 | 0.99 | 14.0 | 5.12 |                 |  | 3 |
| 433.1495 | C22H26O9 | Dimer  | -0.6 | 1.04 | 10.0 | 4.36 |                 |  | 3 |
|          |          |        |      | 0.88 |      | 4.42 |                 |  | 3 |
| 451.1759 | C26H28O7 | Trimer | -0.3 | 0.86 | 13.0 | 4.62 |                 |  | 3 |
| 465.1910 | C27H30O7 | Trimer | -0.9 | 1.01 | 13.0 | 4.42 |                 |  | 3 |
| 483.2019 | C27H32O8 | Trimer | -0.5 | 0.96 | 12.0 | 5.19 |                 |  | 3 |
|          |          |        |      | 0.85 |      | 5.40 |                 |  | 3 |
|          |          |        |      | 0.95 |      | 5.83 |                 |  | 3 |
| 511.1965 | C28H32O9 | Trimer | -0.8 | 0.93 | 13.0 | 5.56 |                 |  | 3 |
|          |          |        |      | 0.90 |      | 6.12 |                 |  | 3 |
|          |          |        |      | 0.92 |      | 6.16 |                 |  | 3 |



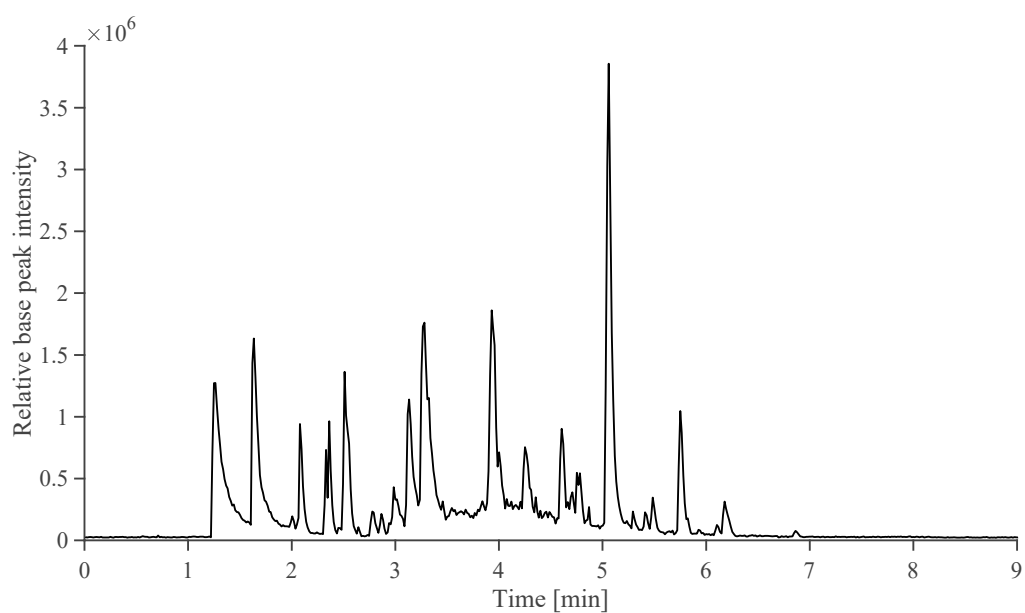

Figure S1. BPI of BDM170 (data already presented previously in Prothmann et al. 2020 [1]).

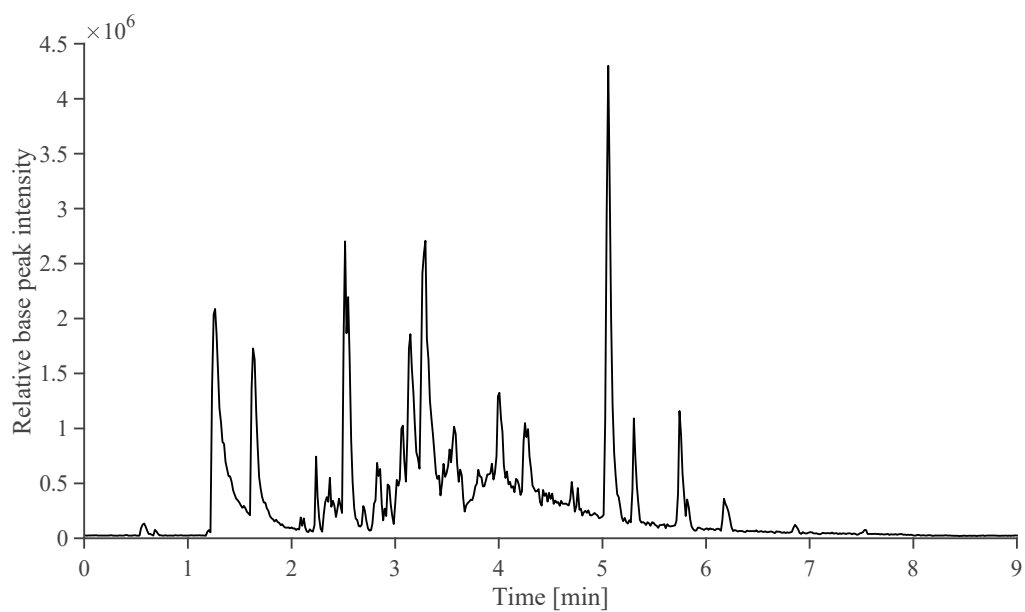

Figure S2. BPI of sample BDM210.

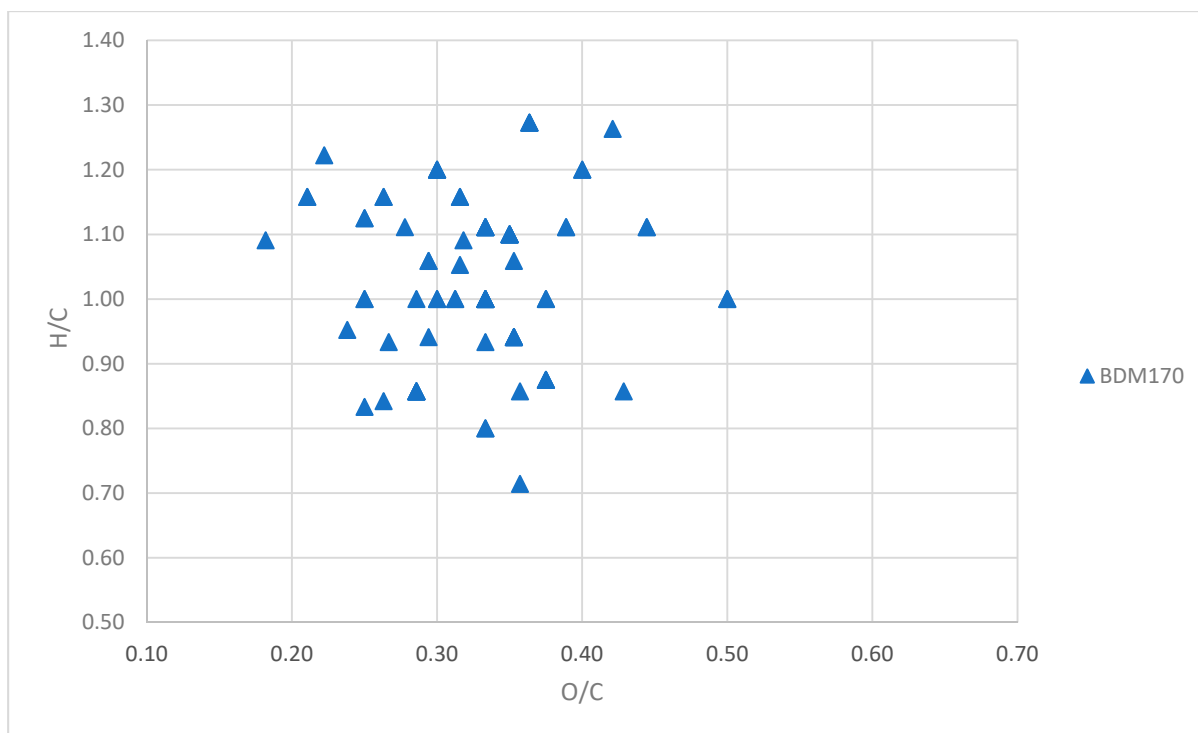

Figure S3. Van-Krevelen plot of sample BDM170.

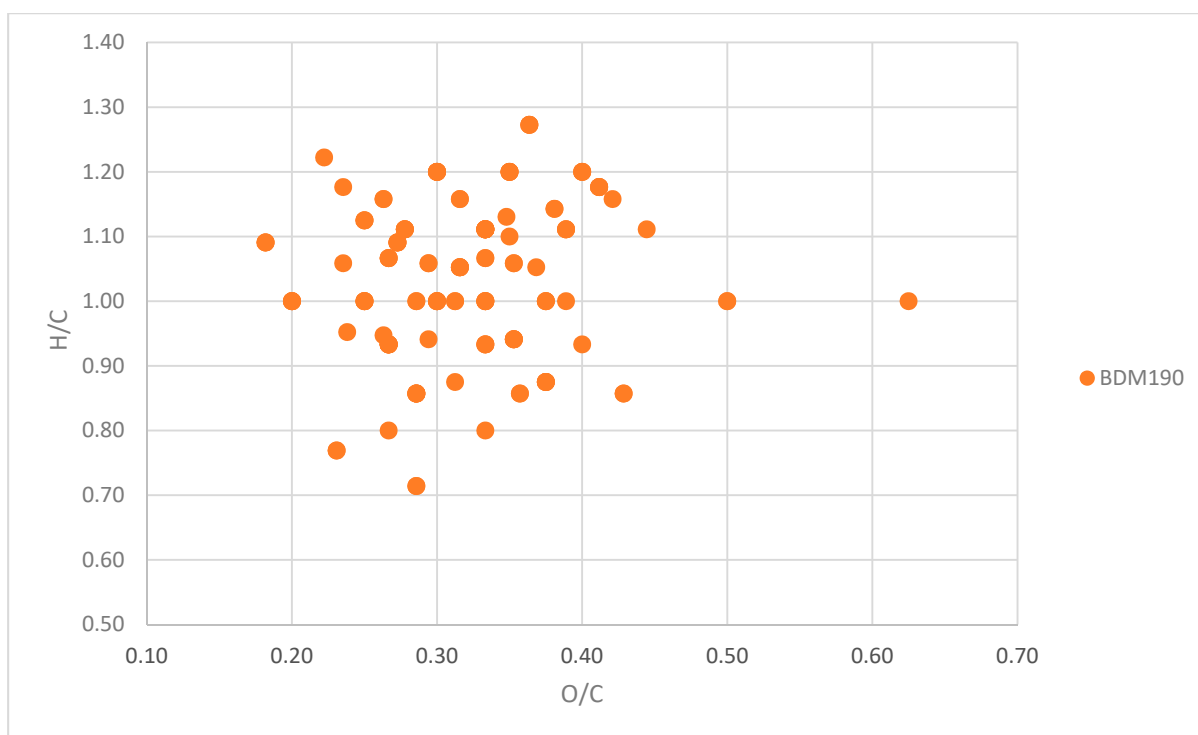

Figure S4. Van-Krevelen plot of sample BDM190.

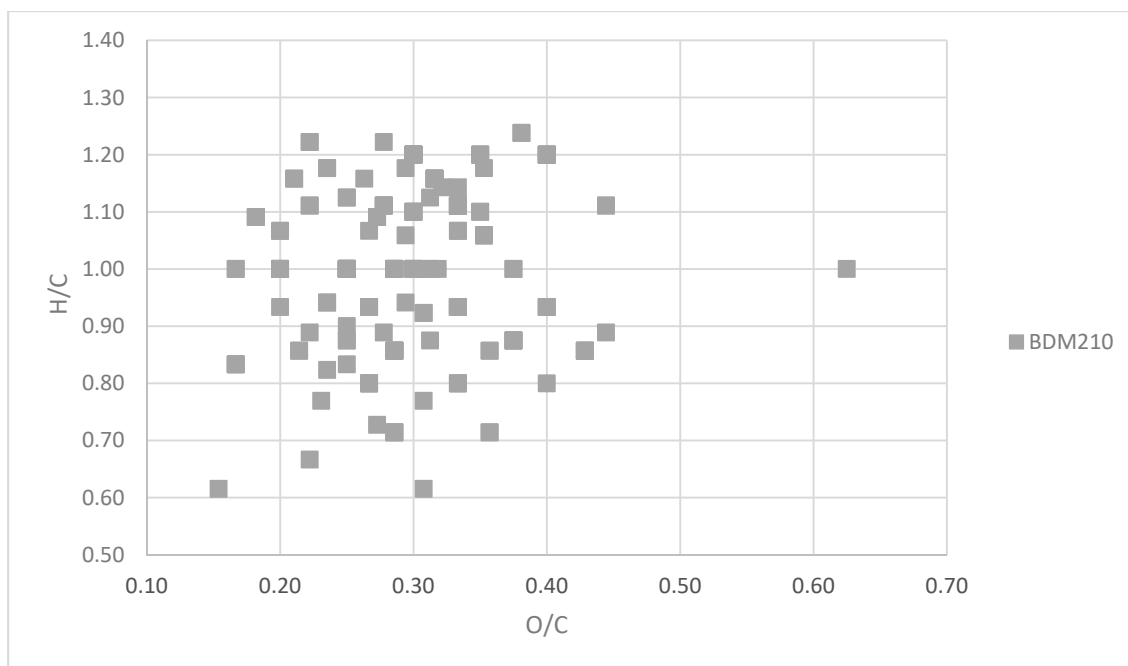

Figure S5. Van-Krevelen plot of sample BDM210.

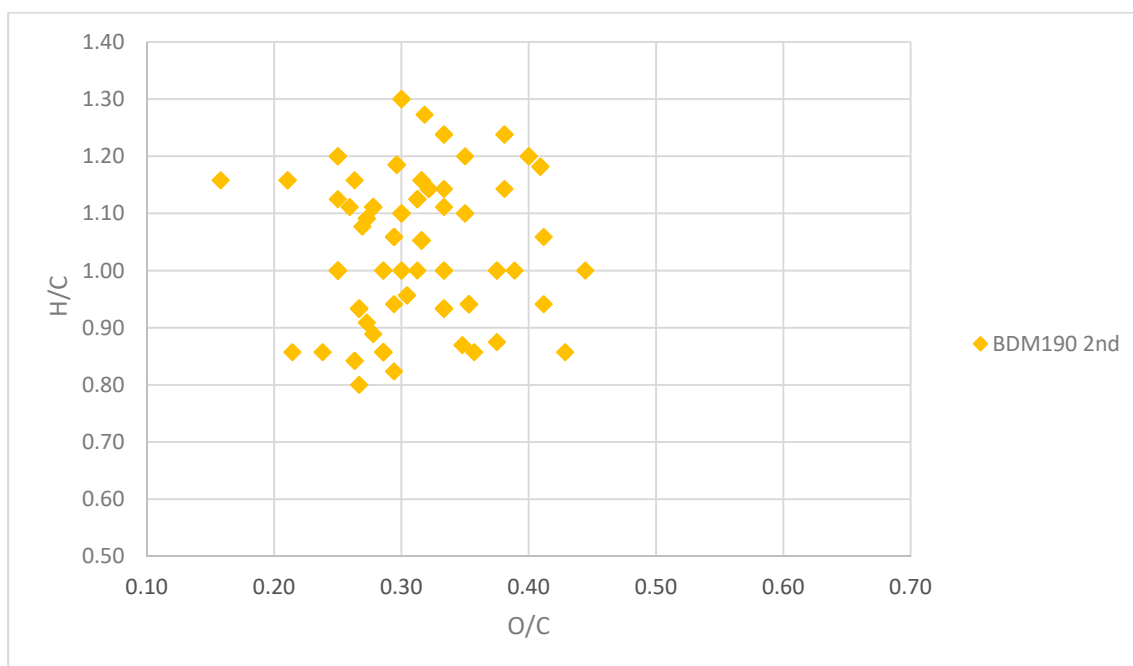

Figure S6. Van-Krevelen plot of sample 2BDM190.

## Reference

- [1] J. Prothmann, K. Li, C. Hultberg, P. Spégl, M. Sandahl, C. Turner, Nontargeted Analysis Strategy for the Identification of Phenolic Compounds in Complex Technical Lignin Samples, *ChemSusChem*. (2020) 4605–4612.  
<https://doi.org/10.1002/cssc.202000951>.
